# Supplementary material for: Chaperonin TRiC/CCT supports mitotic exit and entry into endocycle in Drosophila
Source: PLoS Genet. 2019 Apr 29;15(4):e1008121. doi: 10.1371/journal.pgen.1008121 (PMC6508744; doi:10.1371/journal.pgen.1008121)
Supplement: S6 Table — * BDSC, Bloomington Drosophila Stock Center; VDRC, Vienna Drosophila Resource Center; NIG, National Institute of Genetics. (XLSX) [file pgen.1008121.s016.xlsx]

## Sheet: S6_RNAi
Target gene	Source*	Stock#	Inserted chromosome
fzr	VDRC	v25553	2
cycA	NIG	5940R-1	3
cycB	NIG	3510R-1	2
cct1	NIG	HMS00639	3
cct2	NIG	HMS01190	3
cct3	BDSC	34969	3
cct4	NIG	5525R-3	3
cct5	VDRC	v109505	2
cct6	VDRC	v109734	2
cct7	NIG	8351R-3	2
cct8	NIG	8258R-2	3
